# Correction: Novel insights into the recognition of acetylated histone H4 tail by the TRIM24 PHD-Bromo module

Ishita Bardhan, Soumen Barman, Anirban Roy and  Babu Sudhamalla

Bardhan, I., Barman, S., Roy, A., and Sudhamalla, B. (2023) Novel insights into the recognition of acetylated histone H4 tail by the TRIM24 PHD-Bromo module. *Biochem. J.* **480** (9): 629–647. doi: <https://doi.org/10.1042/BCJ20230011>

Due to an error in the production process, [Table 1](#) was omitted from the published article. The complete [Table 1](#) is presented here. Portland Press apologises for the error.

**Table 1. Binding affinities of the TRIM24 PHD-Bromo and Bromo alone to acetylated histone H4 peptides as measured by ITC**

| Histone peptide              | Peptide sequence             | TRIM24-PHD-Bromo ITC $K_D$ ( $\mu\text{M}$ ) | TRIM24-Bromo ITC $K_D$ ( $\mu\text{M}$ ) |
|------------------------------|------------------------------|----------------------------------------------|------------------------------------------|
| H4(1-20)unmodified           | SGRGKGGKGLGKGGAKRHRK         | No binding                                   | No binding                               |
| H4(1-15)K5ac                 | SGRGKacGGKGLGKGGGA           | $7.5 \pm 1.0$                                | $6.5 \pm 1.2$                            |
| H4(1-15)K8ac                 | SGRGKGGKacGLGKGGGA           | $4.2 \pm 1.3$                                | $5.5 \pm 1.0$                            |
| H4(1-15)K12ac                | SGRGKGGKGLGKacGGA            | > 500                                        | > 500                                    |
| H4(11-21)K16ac               | GKGGAKacRHRKVY               | $6.0 \pm 1.0$                                | $6.5 \pm 1.0$                            |
| H4(1-15)K5acK8ac             | SGRGKacGGKacGLGKGGGA         | $4.2 \pm 1.4$                                | $5.2 \pm 1.0$                            |
| H4(1-15)K5acK12ac            | SGRGKacGGKGLGKacGGA          | $9.4 \pm 1.0$                                | $8.6 \pm 1.0$                            |
| H4(1-15)K8acK12ac            | SGRGKGGKacGLGKacGGA          | $8.6 \pm 1.0$                                | $9.4 \pm 1.2$                            |
| H4(1-20)Kac4 (K5/K8/K12/K16) | SGRGKacGGKacGLGKacGGAKacRHRK | $12.8 \pm 1.0$                               | $14.5 \pm 1.0$                           |

Correction published:  
31 May 2023
